# Supplementary material
Source: PubMed Central journal article supplement (PMC7515249)
Supplement: JB.00331-20-s0001.pdf [file JB.00331-20-s0001.pdf]

## **Supplementary Material**

Protein Nanowires: The Electrification of the Microbial World and Maybe Our Own

Derek R. Lovley<sup>1,2</sup> and Dawn E. Holmes<sup>1,3</sup>

<sup>1</sup>Department of Microbiology, University of Massachusetts, Amherst MA

<sup>2</sup>Institute of Applied Life Sciences, University of Massachusetts, Amherst MA

<sup>3</sup>Department of Physical and Biological Sciences, Western New England University, Springfield, MA, USA

The conductivity of a relatively small number of microbially produced protein nanowires has been evaluated to date because conductivity measurements are laborious. Randomly screening the microbial world for conductive protein nanowires is not yet technically feasible. Therefore, a selection process to identify likely candidates is needed. From the available conductivity measurements it appears that pilin/archaeellin monomers likely to be assembled into e-pili and e-archaeella (i.e. e-pilins and e-archaeellins) will have an abundance of aromatic amino acids above the minimum threshold of 9% found in known e-pili; and (3) no large gaps (>40 amino acids) within the pilin monomer that lack aromatic amino acids (1). Further analysis of the available genome sequences of bacteria and archaea thought to be electroactive, as well as metagenomic data from anaerobic methane-oxidizing consortia that are potentially electroactive revealed putative e-pilins and e-archaeellins from a broad phylogenetic range of bacteria and archaea (Supplementary Table 1).

**Supplementary Table 1.** Putative e-pili found in a diversity of Bacteria and Archaea in Alphabetic Order by Phylum

| Species                               | Number of amino acids <sup>1</sup> | Number of aromatic amino Acids | Percent aromatic amino acids | Gap w/o Aromatics <sup>2</sup> | Locus ID          | Phylum              | Class           | Order             | Family              |
|---------------------------------------|------------------------------------|--------------------------------|------------------------------|--------------------------------|-------------------|---------------------|-----------------|-------------------|---------------------|
| <i>Acidithrix ferrooxidans</i>        | 144                                | 14                             | 9.72                         | 25                             | AFO_01365         | Actinobacteria      | Acidimicrobiia  | Acidimicrobiales  | Acidimicrobiaceae   |
| <i>Ferrimicrobium acidiphilum</i>     | 163                                | 15                             | 9.20                         | 32                             | Q367DRAFT_01793   | Actinobacteria      | Acidimicrobiia  | Acidimicrobiales  | Acidimicrobiaceae   |
| <i>Ferrithrix thermotolerans</i>      | 172                                | 17                             | 9.88                         | 27                             | EJ54DRAFT_00492   | Actinobacteria      | Acidimicrobiia  | Acidimicrobiales  | Acidimicrobiaceae   |
| <i>Hydrogenobacter thermophilus</i>   | 88                                 | 14                             | 15.91                        | 27                             | Hydth_0253        | Aquificae           | Aquificae       | Aquificales       | Aquificaceae        |
| <i>Hydrogenobacter thermophilus</i>   | 155                                | 22                             | 14.19                        | 22                             | Hydth_0658        | Aquificae           | Aquificae       | Aquificales       | Aquificaceae        |
| <i>Hydrogenobacter thermophilus</i>   | 189                                | 25                             | 13.23                        | 16                             | Hydth_1431        | Aquificae           | Aquificae       | Aquificales       | Aquificaceae        |
| <i>Thermocrinis ruber</i>             | 132                                | 17                             | 12.88                        | 22                             | Theru_1134        | Aquificae           | Aquificae       | Aquificales       | Aquificaceae        |
| <i>Prolixibacter denitrificans</i>    | 125                                | 14                             | 11.20                        | 40                             | Ga0181020_10443   | Bacteroidetes       | Bacteroidia     | Marinilabiliales  | Prolixibacteraceae  |
| <i>Caldisericum exile</i>             | 129                                | 14                             | 10.85                        | 29                             | CSE_13170         | Caldiserica         | Caldisericia    | Caldisericales    | Caldiseriaceae      |
| <i>Caldisericum exile</i>             | 177                                | 32                             | 18.08                        | 19                             | CSE_13250         | Caldiserica         | Caldisericia    | Caldisericales    | Caldiseriaceae      |
| <i>Caldisericum exile</i>             | 182                                | 24                             | 13.19                        | 21                             | CSE_13310         | Caldiserica         | Caldisericia    | Caldisericales    | Caldiseriaceae      |
| <i>Caldisericum exile</i>             | 140                                | 14                             | 10.00                        | 42                             | CSE_14670         | Caldiserica         | Caldisericia    | Caldisericales    | Caldiseriaceae      |
| <i>Caldisericum exile</i>             | 168                                | 20                             | 11.90                        | 24                             | CSE_15700         | Caldiserica         | Caldisericia    | Caldisericales    | Caldiseriaceae      |
| <i>Calditerrivibrio nitroreducens</i> | 119                                | 16                             | 13.45                        | 22                             | Calni_0149        | Deferribacteres     | Deferribacteres | Deferribacterales | Deferribacteraceae  |
| <i>Deferribacter autotrophicus</i>    | 57                                 | 8                              | 14.04                        | 22                             | WP_149265799      | Deferribacteres     | Deferribacteres | Deferribacterales | Deferribacteraceae  |
| <i>Deferribacter desulfuricans</i>    | 59                                 | 8                              | 13.56                        | 22                             | DEFDS_1270        | Deferribacteres     | Deferribacteres | Deferribacterales | Deferribacteraceae  |
| <i>Flexistipes sinusarabici</i>       | 60                                 | 8                              | 13.33                        | 22                             | WP_013887342      | Deferribacteres     | Deferribacteres | Deferribacterales | Deferribacteraceae  |
| <i>Geovibrio thiophilus</i>           | 140                                | 16                             | 11.43                        | 22                             | K300DRAFT_1049    | Deferribacteres     | Deferribacteres | Deferribacterales | Deferribacteraceae  |
| <i>Geovibrio thiophilus</i>           | 134                                | 14                             | 10.45                        | 22                             | K300DRAFT_1050    | Deferribacteres     | Deferribacteres | Deferribacterales | Deferribacteraceae  |
| <i>Thermus scotoductus</i>            | 111                                | 10                             | 9.01                         | 37                             | WP_038068616      | Deinococcus-Thermus | Deinococci      | Thermales         | Thermaceae          |
| <i>Alicyclobacillus contaminans</i>   | 109                                | 11                             | 10.09                        | 28                             | G463DRAFT_00356   | Firmicutes          | Bacilli         | Bacillales        | Alicyclobacillaceae |
| <i>Bacillus subterraneus</i>          | 133                                | 14                             | 10.53                        | 25                             | Ga0077506_107138  | Firmicutes          | Bacilli         | Bacillales        | Bacillaceae         |
| <i>Bacillus subtilis</i>              | 133                                | 12                             | 9.02                         | 33                             | U712_12060        | Firmicutes          | Bacilli         | Bacillales        | Bacillaceae         |
| <i>Bacillus thuringiensis</i>         | 146                                | 25                             | 17.12                        | 15                             | Ga0111280_114278  | Firmicutes          | Bacilli         | Bacillales        | Bacillaceae         |
| <i>Tepidibacillus fermentans</i>      | 114                                | 13                             | 11.40                        | 32                             | Ga0126213_11834   | Firmicutes          | Bacilli         | Bacillales        | Bacillaceae         |
| <i>Enterococcus faecalis</i>          | 141                                | 22                             | 15.60                        | 28                             | Ga0399220_01_1952 | Firmicutes          | Bacilli         | Lactobacillales   | Enterococcaceae     |
| <i>Enterococcus faecalis</i>          | 141                                | 22                             | 15.60                        | 28                             | 321_1952764       | Firmicutes          | Bacilli         | Lactobacillales   | Enterococcaceae     |

|                                           |     |    |       |    |                              |            |            |               |                |
|-------------------------------------------|-----|----|-------|----|------------------------------|------------|------------|---------------|----------------|
| <i>Anaerobaculum</i>                      | 105 | 11 | 10.48 | 28 | 321_1952764                  | Firmicutes | Clostridia | Clostridiales | Clostridiaceae |
| <i>Anaerobaculum carboniphilum</i>        | 138 | 20 | 14.49 | 25 | Ga0415316_16_2790<br>3_28247 | Firmicutes | Clostridia | Clostridiales | Clostridiaceae |
| <i>Anaerobaculum carboniphilum</i>        | 124 | 16 | 12.90 | 38 | Ga0415316_16_3417<br>3_34610 | Firmicutes | Clostridia | Clostridiales | Clostridiaceae |
| <i>Caloramator fervidus</i>               | 111 | 10 | 9.01  | 25 | Ga0056065_00030              | Firmicutes | Clostridia | Clostridiales | Clostridiaceae |
| <i>Caloranaerobacter ferrireducens</i>    | 137 | 21 | 15.33 | 15 | Ga0308728_101715             | Firmicutes | Clostridia | Clostridiales | Clostridiaceae |
| <i>Clostridium aceticum</i>               | 101 | 15 | 14.85 | 19 | CACET_c18330                 | Firmicutes | Clostridia | Clostridiales | Clostridiaceae |
| <i>Clostridium aceticum</i>               | 141 | 17 | 12.06 | 22 | CACET_c27740                 | Firmicutes | Clostridia | Clostridiales | Clostridiaceae |
| <i>Clostridium acetobutylicum</i>         | 133 | 16 | 12.03 | 20 | CAC2100                      | Firmicutes | Clostridia | Clostridiales | Clostridiaceae |
| <i>Clostridium acetobutylicum</i>         | 122 | 13 | 10.66 | 20 | CAC2101                      | Firmicutes | Clostridia | Clostridiales | Clostridiaceae |
| <i>Clostridium kluyveri</i>               | 121 | 11 | 9.09  | 27 | CKL_1207                     | Firmicutes | Clostridia | Clostridiales | Clostridiaceae |
| <i>Clostridium ljungdahlii</i>            | 142 | 17 | 11.97 | 25 | CLJU_c10920                  | Firmicutes | Clostridia | Clostridiales | Clostridiaceae |
| <i>Clostridium thiosulfatireducens</i>    | 141 | 17 | 12.06 | 29 | WP_150844840                 | Firmicutes | Clostridia | Clostridiales | Clostridiaceae |
| <i>Clostridium ultunense</i>              | 177 | 16 | 9.04  | 31 | CULDRAFT_01744               | Firmicutes | Clostridia | Clostridiales | Clostridiaceae |
| <i>Natronincola peptidovorans</i>         | 138 | 17 | 12.32 | 25 | WP_090438371                 | Firmicutes | Clostridia | Clostridiales | Clostridiaceae |
| <i>Thermotalea metallivorans</i>          | 159 | 24 | 15.09 | 14 | WP_068555160                 | Firmicutes | Clostridia | Clostridiales | Clostridiaceae |
| <i>Desulfotobacterium chlororespirans</i> | 151 | 25 | 16.56 | 14 | EJ42DRAFT_03096              | Firmicutes | Clostridia | Clostridiales | Peptococcaceae |
| <i>Desulfotobacterium dehalogenans</i>    | 156 | 20 | 12.82 | 18 | Desde_2966                   | Firmicutes | Clostridia | Clostridiales | Peptococcaceae |
| <i>Desulfotobacterium hafniese</i>        | 153 | 18 | 11.76 | 19 | Dhaf_3553                    | Firmicutes | Clostridia | Clostridiales | Peptococcaceae |
| <i>Desulfosporosinus fructosivorans</i>   | 114 | 11 | 9.65  | 22 | WP_135547716                 | Firmicutes | Clostridia | Clostridiales | Peptococcaceae |
| <i>Desulfosporosinus meridei</i>          | 114 | 11 | 9.65  | 22 | Desmer_0976                  | Firmicutes | Clostridia | Clostridiales | Peptococcaceae |
| <i>Desulfosporosinus meridei</i>          | 147 | 16 | 10.88 | 24 | Desmer_0976                  | Firmicutes | Clostridia | Clostridiales | Peptococcaceae |
| <i>Desulfotomaculum alcoholivorax</i>     | 182 | 19 | 10.44 | 36 | H569DRAFT_00254              | Firmicutes | Clostridia | Clostridiales | Peptococcaceae |
| <i>Desulfotomaculum alcoholivorax</i>     | 121 | 11 | 9.09  | 25 | H569DRAFT_03578              | Firmicutes | Clostridia | Clostridiales | Peptococcaceae |
| <i>Desulfotomaculum alcoholivorax</i>     | 140 | 21 | 15.00 | 25 | H569DRAFT_03103              | Firmicutes | Clostridia | Clostridiales | Peptococcaceae |
| <i>Desulfotomaculum reducens</i>          | 112 | 13 | 11.61 | 21 | Dred_1026                    | Firmicutes | Clostridia | Clostridiales | Peptococcaceae |
| <i>Desulfotomaculum reducens</i>          | 160 | 18 | 11.25 | 31 | Dred_3049                    | Firmicutes | Clostridia | Clostridiales | Peptococcaceae |
| <i>Desulfotomaculum</i>                   |     |    |       |    | Desru_3109                   | Firmicutes | Clostridia | Clostridiales | Peptococcaceae |

|                                             |     |    |       |    |                     |            |            |                        |                         |
|---------------------------------------------|-----|----|-------|----|---------------------|------------|------------|------------------------|-------------------------|
| <i>ruminis</i>                              |     |    |       |    |                     |            |            |                        |                         |
| <i>Pelotomaculum sp</i>                     | 169 | 24 | 14.20 | 20 | Ga0073689_1072      | Firmicutes | Clostridia | Clostridiales          | Peptococcaceae          |
| <i>Thermincola ferriacetica</i>             | 100 | 9  | 9.00  | 26 | TferDRAFT_00608     | Firmicutes | Clostridia | Clostridiales          | Peptococcaceae          |
| <i>Thermincola potens</i>                   | 100 | 9  | 9.00  | 26 | TherJR_1751         | Firmicutes | Clostridia | Clostridiales          | Peptococcaceae          |
| <i>Anaerobranca californiensis</i>          | 143 | 20 | 13.99 | 18 | EJ12DRAFT_00456     | Firmicutes | Clostridia | Clostridiales          | Proteiniivoraceae       |
| <i>Anaerobranca californiensis</i>          | 134 | 14 | 10.45 |    | EJ12DRAFT_00441     | Firmicutes | Clostridia | Clostridiales          | Proteiniivoraceae       |
| <i>Dethiobacter alkaliphilus</i>            | 114 | 12 | 10.53 | 25 | DealDRAFT_0772      | Firmicutes | Clostridia | Clostridiales          | Syntrophomonadaceae     |
| <i>Syntrophomonas palmitatica</i>           | 128 | 16 | 12.50 | 24 | Ga0128340_10255     | Firmicutes | Clostridia | Clostridiales          | Syntrophomonadaceae     |
| <i>Syntrophomonas palmitatica</i>           | 118 | 12 | 10.17 | 34 | Ga0128340_10265     | Firmicutes | Clostridia | Clostridiales          | Syntrophomonadaceae     |
| <i>Syntrophomonas sp. JGI 000170CP_G06</i>  | 113 | 11 | 9.73  | 22 | Ga0153857_10404     | Firmicutes | Clostridia | Clostridiales          | Syntrophomonadaceae     |
| <i>Syntrophomonas wolfei</i>                | 148 | 16 | 10.81 | 24 | Swol_0536           | Firmicutes | Clostridia | Clostridiales          | Syntrophomonadaceae     |
| <i>Syntrophomonas wolfei methylbutyrate</i> | 148 | 16 | 10.81 | 24 | Ga0126451_11840     | Firmicutes | Clostridia | Clostridiales          | Syntrophomonadaceae     |
| <i>Syntrophomonas zehnderi</i>              | 157 | 19 | 12.10 | 20 | Ga0124040_12622     | Firmicutes | Clostridia | Clostridiales          | Syntrophomonadaceae     |
| <i>Syntrophomonas zehnderi</i>              | 133 | 12 | 9.02  | 27 | Ga0124040_12621     | Firmicutes | Clostridia | Clostridiales          | Syntrophomonadaceae     |
| <i>Syntrophothermus lipocalidus</i>         | 146 | 17 | 11.64 | 22 | Slip_0396           | Firmicutes | Clostridia | Clostridiales          | Syntrophomonadaceae     |
| <i>Acetohalobium arabaticum</i>             | 109 | 10 | 9.17  | 25 | Accar_1770          | Firmicutes | Clostridia | Halanaerobiales        | Halobacteroidaceae      |
| <i>Orenia metallireducens</i>               | 139 | 19 | 13.67 | 36 | Ga0139028_10291     | Firmicutes | Clostridia | Halanaerobiales        | Halobacteroidaceae      |
| <i>Orenia metallireducens</i>               | 122 | 11 | 9.02  | 38 | Ga0139028_106178    | Firmicutes | Clostridia | Halanaerobiales        | Halobacteroidaceae      |
| <i>Caldanaerobacter subterraneus</i>        | 161 | 16 | 9.94  | 31 | Ga0310466_10291     | Firmicutes | Clostridia | Thermoanaerobacterales | Thermoanaerobacteraceae |
| <i>Carboxydotherrnus ferrireducens</i>      | 137 | 19 | 13.87 | 19 | CarfeDRAFT_00001450 | Firmicutes | Clostridia | Thermoanaerobacterales | Thermoanaerobacteraceae |
| <i>Carboxydotherrnus hydrogenoformans</i>   | 137 | 19 | 13.87 | 19 | CHY_0635            | Firmicutes | Clostridia | Thermoanaerobacterales | Thermoanaerobacteraceae |
| <i>Carboxydotherrnus islandicus</i>         | 137 | 20 | 14.60 | 19 | Ga0346999_2021      | Firmicutes | Clostridia | Thermoanaerobacterales | Thermoanaerobacteraceae |
| <i>Carboxydotherrnus pertinax</i>           | 138 | 19 | 13.77 | 19 | Ga0346998_1554      | Firmicutes | Clostridia | Thermoanaerobacterales | Thermoanaerobacteraceae |
| <i>Moorella humiferrea</i>                  | 121 | 11 | 9.09  | 31 | WP_106006102        | Firmicutes | Clostridia | Thermoanaerobacterales | Thermoanaerobacteraceae |
| <i>Moorella humiferrea</i>                  | 141 | 15 | 10.64 | 28 | WP_106006103        | Firmicutes | Clostridia | Thermoanaerobacterales | Thermoanaerobacteraceae |
| <i>Moorella humiferrea</i>                  | 172 | 18 | 10.47 | 42 | WP_106006106        | Firmicutes | Clostridia | Thermoanaerobacterales | Thermoanaerobacteraceae |
| <i>Moorella stamsii</i>                     | 120 | 11 | 9.17  | 31 | Ga0309394_10513     | Firmicutes | Clostridia | Thermoanaerobacterales | Thermoanaerobacteraceae |
| <i>Moorella stamsii</i>                     | 115 | 14 | 12.17 | 25 | Ga0309394_10517     | Firmicutes | Clostridia | Thermoanaerobacterales | Thermoanaerobacteraceae |
| <i>Tepidanaerobacter sp</i>                 | 144 | 17 | 11.81 | 30 | TepRe1_1415         | Firmicutes | Clostridia | Thermoanaerobacterales | Thermoanaerobacteraceae |

|                                        |     |    |       |    |                                |                |                     |                           |                                       |
|----------------------------------------|-----|----|-------|----|--------------------------------|----------------|---------------------|---------------------------|---------------------------------------|
| <i>Rel</i>                             |     |    |       |    |                                |                |                     |                           |                                       |
| <i>Tepidanaerobacter sp</i>            | 145 | 14 | 9.66  | 22 | TepRe1_1417                    | Firmicutes     | Clostridia          | Thermoanaerobacterales    | Thermoanaerobacteraceae               |
| <i>Rel</i>                             |     |    |       |    |                                |                |                     |                           |                                       |
| <i>Tepidanaerobacter syntrophicus</i>  | 140 | 16 | 11.43 | 30 | Ga0248248_109374               | Firmicutes     | Clostridia          | Thermoanaerobacterales    | Thermoanaerobacteraceae               |
| <i>Pelosinus fermentans</i>            | 149 | 16 | 10.74 | 29 | Ga0248297_2354                 | Firmicutes     | Negativicutes       | Selenomonadales           | Sporomusaceae                         |
| <i>Pelosinus lilaceae</i>              | 159 | 15 | 9.43  | 20 | UFO1_1776                      | Firmicutes     | Negativicutes       | Selenomonadales           | Sporomusaceae                         |
| <i>Sporomusa ovata</i>                 | 119 | 12 | 10.08 | 25 | G571DRAFT_00990                | Firmicutes     | Negativicutes       | Selenomonadales           | Sporomusaceae                         |
| <i>Sporomusa silvacetica</i>           | 119 | 12 | 10.08 | 25 | Ga0336821_2460                 | Firmicutes     | Negativicutes       | Selenomonadales           | Sporomusaceae                         |
| <i>Sporomusa sphaeroides</i>           | 114 | 14 | 12.28 | 25 | SPSPH_15410                    | Firmicutes     | Negativicutes       | Selenomonadales           | Sporomusaceae                         |
| <i>Sporanaerobacter acetigenes</i>     | 152 | 14 | 9.21  | 35 | EJ96DRAFT_00445                | Firmicutes     | Tissierellia        | Tissierellales            | Tissierellaceae                       |
| <i>Sporanaerobacter acetigenes</i>     | 179 | 22 | 12.29 | 23 | EJ96DRAFT_00443                | Firmicutes     | Tissierellia        | Tissierellales            | Tissierellaceae                       |
| <i>Dethiosulfatibacter aminovorans</i> | 126 | 12 | 9.52  | 22 | EJ55DRAFT_00807                | Firmicutes     | Tissierellia        | unclassified Tissierellia |                                       |
| <i>Dethiosulfatibacter aminovorans</i> | 117 | 12 | 10.26 | 22 | EJ55DRAFT_00808                | Firmicutes     | Tissierellia        | unclassified Tissierellia |                                       |
| <i>Leptospirillum ferriphilum</i>      | 136 | 15 | 11.03 | 38 | LFML04_0966                    | Nitrospirae    | Nitrospira          | Nitrospirales             | Nitrospiraceae                        |
| <i>Leptospirillum ferrooxidans</i>     | 146 | 14 | 9.59  | 22 | LFE_0495                       | Nitrospirae    | Nitrospira          | Nitrospirales             | Nitrospiraceae                        |
| <i>Rhodopseudomonas palustris</i>      | 131 | 15 | 11.45 | 24 | RPE_2661                       | Proteobacteria | alphaproteobacteria | Rhizobiales               | Bradyrhizobiaceae                     |
| <i>Acidiphilium angustum</i>           | 130 | 12 | 9.23  | 24 | T342DRAFT_01602                | Proteobacteria | alphaproteobacteria | Rhodospirillales          | Acetobacteraceae                      |
| <i>Acidiphilium rubrum</i>             | 130 | 12 | 9.23  | 24 | Ga0104712_111112               | Proteobacteria | alphaproteobacteria | Rhodospirillales          | Acetobacteraceae                      |
| <i>Acidocella aromatica</i>            | 132 | 12 | 9.09  | 28 | Ga0415365_01_4437<br>06_444155 | Proteobacteria | alphaproteobacteria | Rhodospirillales          | Acetobacteraceae                      |
| <i>Leptothrix mobilis</i>              | 142 | 18 | 12.68 | 22 | Ga0310535_0991                 | Proteobacteria | betaproteobacteria  | Burkholderiales           | Burkholderiales genera incertae sedis |
| <i>Pseudogulbenkiana ferrooxidans</i>  | 129 | 18 | 13.95 | 24 | WP_008955084                   | Proteobacteria | betaproteobacteria  | Neisseriales              | Chromobacteriaceae                    |
| <i>Pseudogulbenkiana ferrooxidans</i>  | 118 | 12 | 10.17 | 22 | WP_008955093                   | Proteobacteria | betaproteobacteria  | Neisseriales              | Chromobacteriaceae                    |
| <i>Pseudogulbenkiana ferrooxidans</i>  | 131 | 14 | 10.69 | 22 | WP_008952214                   | Proteobacteria | betaproteobacteria  | Neisseriales              | Chromobacteriaceae                    |
| <i>Ferriphasselus amnicola</i>         | 135 | 14 | 10.37 | 22 | Ga0325215_2722                 | Proteobacteria | betaproteobacteria  | Nitrosomonadales          | Gallionellaceae                       |
| <i>Gallionella capsiferriformans</i>   | 125 | 13 | 10.40 | 22 | Galf_0171                      | Proteobacteria | betaproteobacteria  | Nitrosomonadales          | Gallionellaceae                       |
| <i>Sideroxydans lithotrophicus</i>     | 133 | 12 | 9.02  | 23 | Slit_2082                      | Proteobacteria | betaproteobacteria  | Nitrosomonadales          | Gallionellaceae                       |
| <i>Sulfuricella denitrificans</i>      | 138 | 15 | 10.87 | 22 | 2533684932                     | Proteobacteria | betaproteobacteria  | Nitrosomonadales          | Gallionellaceae                       |
| <i>Sulfuriferula thiophila</i>         | 138 | 17 | 12.32 | 19 | Ga0399904_1683                 | Proteobacteria | betaproteobacteria  | Nitrosomonadales          | Gallionellaceae                       |
| <i>Sulfurirhabdus autotrophica</i>     | 137 | 15 | 10.95 | 22 | Ga0244719_10323                | Proteobacteria | betaproteobacteria  | Nitrosomonadales          | Gallionellaceae                       |

|                                           |     |    |       |    |                   |                |                     |                    |                     |
|-------------------------------------------|-----|----|-------|----|-------------------|----------------|---------------------|--------------------|---------------------|
| <i>Sulfurirhabdus autotrophica</i>        | 139 | 14 | 10.07 | 22 | Ga0244719_1362    | Proteobacteria | betaproteobacteria  | Nitrosomonadales   | Gallionellaceae     |
| <i>Sulfuritalea hydrogenivorans</i>       | 144 | 13 | 9.03  | 22 | WP_041100254      | Proteobacteria | betaproteobacteria  | Nitrosomonadales   | Sterolibacteriaceae |
| <i>Thiobacillus denitrificans</i>         | 126 | 13 | 10.32 | 33 | Tbd_1865          | Proteobacteria | betaproteobacteria  | Nitrosomonadales   | Thiobacillaceae     |
| <i>Azonexus hydrophilus</i>               | 122 | 13 | 10.66 | 33 | G471DRAFT_2125    | Proteobacteria | betaproteobacteria  | Rhodocyclales      | Azonexaceae         |
| <i>Thauera humireducens</i>               | 144 | 16 | 11.11 | 22 | Ga0213668_112217  | Proteobacteria | betaproteobacteria  | Rhodocyclales      | Zoogloeaceae        |
| <i>Desulfarculus baarsii</i>              | 130 | 13 | 10.00 | 24 | ADK84707          | Proteobacteria | deltaproteobacteria | Desulfarculales    | Desulfarculaceae    |
| <i>Desulfocarbo indianensis</i>           | 130 | 12 | 9.23  | 24 | Ga0081924_1001958 | Proteobacteria | deltaproteobacteria | Desulfarculales    | Desulfarculaceae    |
| <i>Desulfatibacillum aliphaticivorans</i> | 114 | 14 | 12.28 | 22 | Dalk_3114         | Proteobacteria | deltaproteobacteria | Desulfobacterales  | Desulfobacteraceae  |
| <i>Desulfatibacillum aliphaticivorans</i> | 116 | 11 | 9.48  | 25 | Dalk_1373         | Proteobacteria | deltaproteobacteria | Desulfobacterales  | Desulfobacteraceae  |
| <i>Desulfobacter hydrogenophilus</i>      | 167 | 16 | 9.58  | 35 | WP_111952979      | Proteobacteria | deltaproteobacteria | Desulfobacterales  | Desulfobacteraceae  |
| <i>Desulfobacterium autotrophicum</i>     | 59  | 9  | 15.25 | 22 | HRM2_27700        | Proteobacteria | deltaproteobacteria | Desulfobacterales  | Desulfobacteraceae  |
| <i>Desulfofaba hansenii</i>               | 143 | 19 | 13.29 | 22 | Ga0205213_103919  | Proteobacteria | deltaproteobacteria | Desulfobacterales  | Desulfobacteraceae  |
| <i>Desulfospira joergensenii</i>          | 145 | 14 | 9.66  | 22 | F608DRAFT_4571    | Proteobacteria | deltaproteobacteria | Desulfobacterales  | Desulfobacteraceae  |
| <i>Desulfocapsa sulfexigens</i>           | 60  | 7  | 11.67 | 22 | UWK_02275         | Proteobacteria | deltaproteobacteria | Desulfobacterales  | Desulfobulbaceae    |
| <i>Desulfocapsa thiozymogenes</i>         | 144 | 15 | 10.42 | 22 | A316_01724        | Proteobacteria | deltaproteobacteria | Desulfobacterales  | Desulfobulbaceae    |
| <i>Desulfotalea psychrophila</i>          | 70  | 9  | 12.86 | 22 | DP2041            | Proteobacteria | deltaproteobacteria | Desulfobacterales  | Desulfobulbaceae    |
| <i>Desulfotalea psychrophila</i>          | 120 | 12 | 10.00 | 22 | DP1456            | Proteobacteria | deltaproteobacteria | Desulfobacterales  | Desulfobulbaceae    |
| <i>Desulfurivibrio alkaliphilus</i>       | 182 | 20 | 10.99 | 27 | DaAHT2_2283       | Proteobacteria | deltaproteobacteria | Desulfobacterales  | Desulfobulbaceae    |
| <i>Desulfonauticus submarinus</i>         | 117 | 11 | 9.40  | 23 | Ga0070487_10136   | Proteobacteria | deltaproteobacteria | Desulfovibrionales | Desulfohalobiaceae  |
| <i>Desulfovermiculus halophilus</i>       | 145 | 14 | 9.66  | 25 | N902DRAFT_00254   | Proteobacteria | deltaproteobacteria | Desulfovibrionales | Desulfohalobiaceae  |
| <i>Desulfovermiculus halophilus</i>       | 120 | 12 | 10.00 | 20 | N902DRAFT_02359   | Proteobacteria | deltaproteobacteria | Desulfovibrionales | Desulfohalobiaceae  |
| <i>Desulfomicrobium baculatum</i>         | 121 | 12 | 9.92  | 34 | Dbac_3434         | Proteobacteria | deltaproteobacteria | Desulfovibrionales | Desulfomicrobiaceae |
| <i>Desulfovibrio bastinii</i>             | 147 | 17 | 11.56 | 28 | G496DRAFT_02933   | Proteobacteria | deltaproteobacteria | Desulfovibrionales | Desulfovibrionaceae |
| <i>Desulfovibrio brasiliensis</i>         | 133 | 13 | 9.77  | 22 | Ga0128338_10609   | Proteobacteria | deltaproteobacteria | Desulfovibrionales | Desulfovibrionaceae |
| <i>Desulfovibrio carbinolicus</i>         | 162 | 19 | 11.73 | 21 | Ga0397664_3514    | Proteobacteria | deltaproteobacteria | Desulfovibrionales | Desulfovibrionaceae |
| <i>Desulfovibrio</i>                      | 112 | 13 | 11.61 | 34 | EK04DRAFT_02036   | Proteobacteria | deltaproteobacteria | Desulfovibrionales | Desulfovibrionaceae |

|                                              |     |    |       |    |                  |                |                     |                      |                       |
|----------------------------------------------|-----|----|-------|----|------------------|----------------|---------------------|----------------------|-----------------------|
| <i>desulfuricans</i>                         |     |    |       |    |                  |                |                     |                      |                       |
| <i>Desulfovibrio gracilis</i>                | 125 | 13 | 10.40 | 22 | BR08DRAFT_00601  | Proteobacteria | deltaproteobacteria | Desulfovibrionales   | Desulfovibrionaceae   |
| <i>Desulfovibrio gracilis</i>                | 127 | 12 | 9.45  | 22 | BR08DRAFT_00602  | Proteobacteria | deltaproteobacteria | Desulfovibrionales   | Desulfovibrionaceae   |
| <i>Desulfovibrio idahonensis</i>             | 119 | 11 | 9.24  | 22 | BR09DRAFT_03157  | Proteobacteria | deltaproteobacteria | Desulfovibrionales   | Desulfovibrionaceae   |
| <i>Desulfovibrio longus</i>                  | 129 | 13 | 10.08 | 22 | G452DRAFT_1226   | Proteobacteria | deltaproteobacteria | Desulfovibrionales   | Desulfovibrionaceae   |
| <i>Desulfovibrio mexicanus</i>               | 119 | 11 | 9.24  | 22 | Ga0070557_1670   | Proteobacteria | deltaproteobacteria | Desulfovibrionales   | Desulfovibrionaceae   |
| <i>Desulfovibrio sulfodismutans</i>          | 154 | 16 | 10.39 | 23 | WP_163301444     | Proteobacteria | deltaproteobacteria | Desulfovibrionales   | Desulfovibrionaceae   |
| <i>Desulfurella acetivorans</i>              | 140 | 15 | 10.71 | 34 | Desace_0849      | Proteobacteria | deltaproteobacteria | Desulfurellales      | Desulfurellaceae      |
| <i>Desulfurella multipotens</i>              | 143 | 14 | 9.79  | 27 | Ga0056076_00842  | Proteobacteria | deltaproteobacteria | Desulfurellales      | Desulfurellaceae      |
| <i>Hippea alviniae</i>                       | 114 | 16 | 14.04 | 15 | G415DRAFT_0791   | Proteobacteria | deltaproteobacteria | Desulfurellales      | Desulfurellaceae      |
| <i>Hippea alviniae</i>                       | 147 | 18 | 12.24 | 22 | G415DRAFT_0792   | Proteobacteria | deltaproteobacteria | Desulfurellales      | Desulfurellaceae      |
| <i>Hippea alviniae</i>                       | 61  | 8  | 13.11 | 22 | G415DRAFT_0872   | Proteobacteria | deltaproteobacteria | Desulfurellales      | Desulfurellaceae      |
| <i>Hippea jasoniae</i>                       | 199 | 23 | 11.56 | 34 | EK17DRAFT_0428   | Proteobacteria | deltaproteobacteria | Desulfurellales      | Desulfurellaceae      |
| <i>Hippea jasoniae</i>                       | 112 | 15 | 13.39 | 36 | EK17DRAFT_0911   | Proteobacteria | deltaproteobacteria | Desulfurellales      | Desulfurellaceae      |
| <i>Hippea jasoniae</i>                       | 168 | 17 | 10.12 | 29 | EK17DRAFT_1375   | Proteobacteria | deltaproteobacteria | Desulfurellales      | Desulfurellaceae      |
| <i>Hippea maritima</i>                       | 59  | 8  | 13.56 | 22 | Hipma_0737       | Proteobacteria | deltaproteobacteria | Desulfurellales      | Desulfurellaceae      |
| <i>Hippea maritima</i>                       | 164 | 17 | 10.37 | 22 | Hipma_1130       | Proteobacteria | deltaproteobacteria | Desulfurellales      | Desulfurellaceae      |
| <i>Desulfurobacterium indicum</i>            | 125 | 15 | 12.00 | 23 | Ga0347347_463    | Proteobacteria | deltaproteobacteria | Desulfurobacteriales | Desulfurobacteriaceae |
| <i>Desulfurobacterium thermolithotrophum</i> | 128 | 19 | 14.84 | 22 | Dester_0850      | Proteobacteria | deltaproteobacteria | Desulfurobacteriales | Desulfurobacteriaceae |
| <i>Desulfuromonas thiophila</i>              | 59  | 8  | 13.56 | 22 | Ga0056074_12312  | Proteobacteria | deltaproteobacteria | Desulfuromonadales   | Desulfuromonadaceae   |
| <i>Desulfuromusa kysingii</i>                | 60  | 9  | 15.00 | 22 | Ga0056096_02700  | Proteobacteria | deltaproteobacteria | Desulfuromonadales   | Desulfuromonadaceae   |
| <i>Malonomonas rubra</i>                     | 123 | 13 | 10.57 | 22 | EJ68DRAFT_00117  | Proteobacteria | deltaproteobacteria | Desulfuromonadales   | Desulfuromonadaceae   |
| <i>Malonomonas rubra</i>                     | 59  | 10 | 16.95 | 22 | EJ68DRAFT_00580  | Proteobacteria | deltaproteobacteria | Desulfuromonadales   | Desulfuromonadaceae   |
| <i>Pelobacter acetylenicus</i>               | 64  | 8  | 12.50 | 22 | Ga0174877_112174 | Proteobacteria | deltaproteobacteria | Desulfuromonadales   | Desulfuromonadaceae   |
| <i>Pelobacter acetylenicus</i>               | 123 | 14 | 11.38 | 21 | Ga0174877_111717 | Proteobacteria | deltaproteobacteria | Desulfuromonadales   | Desulfuromonadaceae   |
| <i>Pelobacter carbinolicus</i>               | 170 | 21 | 12.35 | 24 | Pcar_2143        | Proteobacteria | deltaproteobacteria | Desulfuromonadales   | Desulfuromonadaceae   |
| <i>Pelobacter carbinolicus</i>               | 185 | 17 | 9.19  | 34 | Pcar_2144        | Proteobacteria | deltaproteobacteria | Desulfuromonadales   | Desulfuromonadaceae   |
| <i>Pelobacter carbinolicus</i>               | 131 | 12 | 9.16  | 33 | Pcar_2154        | Proteobacteria | deltaproteobacteria | Desulfuromonadales   | Desulfuromonadaceae   |
| <i>Pelobacter propionicus</i>                | 64  | 7  | 10.94 | 22 | Ppro_1656        | Proteobacteria | deltaproteobacteria | Desulfuromonadales   | Desulfuromonadaceae   |
| <i>Pelobacter seleniigenes</i>               | 59  | 10 | 16.95 | 22 | N909DRAFT_0006   | Proteobacteria | deltaproteobacteria | Desulfuromonadales   | Desulfuromonadaceae   |
| <i>"Geomonas edaphica"</i>                   | 64  | 7  | 10.94 | 22 | WP_129125765     | Proteobacteria | deltaproteobacteria | Desulfuromonadales   | Geobacteraceae        |
| <i>"Geomonas ferrireducens"</i>              | 59  | 8  | 13.56 | 22 | WP_136525585     | Proteobacteria | deltaproteobacteria | Desulfuromonadales   | Geobacteraceae        |
| <i>"Geomonas oryzae"</i>                     | 64  | 8  | 12.50 | 22 | WP_136513000     | Proteobacteria | deltaproteobacteria | Desulfuromonadales   | Geobacteraceae        |
| <i>"Geomonas terrae"</i>                     | 64  | 7  | 10.94 | 22 | WP_135870226     | Proteobacteria | deltaproteobacteria | Desulfuromonadales   | Geobacteraceae        |
| <i>Gealkalibacter ferrihydriticus</i>        | 61  | 8  | 13.11 | 22 | Ga0056053_00657  | Proteobacteria | deltaproteobacteria | Desulfuromonadales   | Geobacteraceae        |
| <i>Gealkalibacter</i>                        | 66  | 10 | 15.15 | 22 | WP_040199521     | Proteobacteria | deltaproteobacteria | Desulfuromonadales   | Geobacteraceae        |

|                                           |     |    |       |    |                                |                |                     |                     |                  |
|-------------------------------------------|-----|----|-------|----|--------------------------------|----------------|---------------------|---------------------|------------------|
| <i>subterraneus</i>                       |     |    |       |    |                                |                |                     |                     |                  |
| <i>Geobacter anodireducens</i>            | 65  | 7  | 10.77 | 22 | Ga0133348_112105               | Proteobacteria | deltaproteobacteria | Desulfuromonadales  | Geobacteraceae   |
| <i>Geobacter argillaceus</i>              | 65  | 6  | 9.23  | 22 | Ga0052872_01800                | Proteobacteria | deltaproteobacteria | Desulfuromonadales  | Geobacteraceae   |
| <i>Geobacter argillaceus</i>              | 65  | 6  | 9.23  | 22 | Ga0052872_01802                | Proteobacteria | deltaproteobacteria | Desulfuromonadales  | Geobacteraceae   |
| <i>Geobacter bemidjensis</i>              | 66  | 9  | 13.64 | 22 | Gbem_2590                      | Proteobacteria | deltaproteobacteria | Desulfuromonadales  | Geobacteraceae   |
| <i>Geobacter bremensis</i>                | 64  | 10 | 15.63 | 22 | K419DRAFT_00801                | Proteobacteria | deltaproteobacteria | Desulfuromonadales  | Geobacteraceae   |
| <i>Geobacter lovleyi</i>                  | 60  | 6  | 10.00 | 22 | Glov_2096                      | Proteobacteria | deltaproteobacteria | Desulfuromonadales  | Geobacteraceae   |
| <i>Geobacter metallireducens</i>          | 59  | 9  | 15.25 | 22 | Gmet_1399                      | Proteobacteria | deltaproteobacteria | Desulfuromonadales  | Geobacteraceae   |
| <i>Geobacter pelophilus</i>               | 124 | 14 | 11.29 | 22 | Ga0347001_01_3941<br>78_394585 | Proteobacteria | deltaproteobacteria | Desulfuromonadales  | Geobacteraceae   |
| <i>Geobacter pickeringii</i>              | 60  | 7  | 11.67 | 22 | Ga0069007_111762               | Proteobacteria | deltaproteobacteria | Desulfuromonadales  | Geobacteraceae   |
| <i>Geobacter soli</i>                     | 65  | 7  | 10.77 | 22 | Ga0077628_111580               | Proteobacteria | deltaproteobacteria | Desulfuromonadales  | Geobacteraceae   |
| <i>Geobacter sp. M18</i>                  | 64  | 6  | 9.38  | 22 | GM18_2492                      | Proteobacteria | deltaproteobacteria | Desulfuromonadales  | Geobacteraceae   |
| <i>Geobacter sp. M21</i>                  | 64  | 6  | 9.38  | 22 | GM21_1636                      | Proteobacteria | deltaproteobacteria | Desulfuromonadales  | Geobacteraceae   |
| <i>Geobacter sp. OR-1</i>                 | 64  | 8  | 12.50 | 22 | WP_041974243                   | Proteobacteria | deltaproteobacteria | Desulfuromonadales  | Geobacteraceae   |
| <i>Geobacter sulfurreducens</i>           | 61  | 6  | 9.84  | 22 | GSU1496                        | Proteobacteria | deltaproteobacteria | Desulfuromonadales  | Geobacteraceae   |
| <i>Geobacter toluenoxydans</i>            | 77  | 8  | 10.39 | 22 | Ga0128344_12739                | Proteobacteria | deltaproteobacteria | Desulfuromonadales  | Geobacteraceae   |
| <i>Geopsychrobacter electrodiphilus</i>   | 64  | 7  | 10.94 | 22 | D888DRAFT_2042                 | Proteobacteria | deltaproteobacteria | Desulfuromonadales  | Geobacteraceae   |
| <i>Geothermobacter ehrlichii</i>          | 120 | 14 | 11.67 | 23 | Ga0244669_10189                | Proteobacteria | deltaproteobacteria | Desulfuromonadales  | Geobacteraceae   |
| <i>Geothermobacter ehrlichii</i>          | 62  | 9  | 14.52 | 22 | Ga0244669_101102               | Proteobacteria | deltaproteobacteria | Desulfuromonadales  | Geobacteraceae   |
| <i>Anaeromyxobacter dehalogenans</i>      | 188 | 18 | 9.57  | 26 | A2cp1_0669                     | Proteobacteria | deltaproteobacteria | Myxococcales        | Cystobacterineae |
| <i>Anaeromyxobacter sp RBG</i>            | 161 | 18 | 11.18 | 37 | Ga0154716_108720               | Proteobacteria | deltaproteobacteria | Myxococcales        | Cystobacterineae |
| <i>Myxococcus xanthus</i>                 | 208 | 21 | 10.10 | 31 | WP_011555734                   | Proteobacteria | deltaproteobacteria | Myxococcales        | Myxococcaceae    |
| <i>Desulfomonile tiedjei</i>              | 134 | 15 | 11.19 | 30 | Desti_3736                     | Proteobacteria | deltaproteobacteria | Syntrophobacterales | Syntrophaceae    |
| <i>Desulfomonile tiedjei</i>              | 139 | 13 | 9.35  | 30 | Desti_3145                     | Proteobacteria | deltaproteobacteria | Syntrophobacterales | Syntrophaceae    |
| <i>Smithella sp F21</i>                   | 109 | 11 | 10.09 | 22 | Ga0059255_00913                | Proteobacteria | deltaproteobacteria | Syntrophobacterales | Syntrophaceae    |
| <i>Smithella sp F21</i>                   | 166 | 16 | 9.64  | 36 | Ga0059255_01296                | Proteobacteria | deltaproteobacteria | Syntrophobacterales | Syntrophaceae    |
| <i>Smithella sp ME-1</i>                  | 142 | 20 | 14.08 | 21 | Ga0038566_102574               | Proteobacteria | deltaproteobacteria | Syntrophobacterales | Syntrophaceae    |
| <i>Smithella sp ME-1</i>                  | 81  | 8  | 9.88  | 22 | Ga0038566_108923               | Proteobacteria | deltaproteobacteria | Syntrophobacterales | Syntrophaceae    |
| <i>Syntrophus aciditrophicus</i>          | 110 | 12 | 10.91 | 22 | SYN_00814                      | Proteobacteria | deltaproteobacteria | Syntrophobacterales | Syntrophaceae    |
| <i>Syntrophus gentianae</i>               | 129 | 16 | 12.40 | 17 | Ga0074853_14012                | Proteobacteria | deltaproteobacteria | Syntrophobacterales | Syntrophaceae    |
| <i>Syntrophus gentianae</i>               | 124 | 12 | 9.68  | 20 | Ga0074853_103140               | Proteobacteria | deltaproteobacteria | Syntrophobacterales | Syntrophaceae    |
| <i>Syntrophus gentianae</i>               | 120 | 11 | 9.17  | 26 | Ga0074853_10999                | Proteobacteria | deltaproteobacteria | Syntrophobacterales | Syntrophaceae    |
| <i>Syntrophus sp G20</i>                  | 129 | 14 | 10.85 | 23 | Ga0063310_00264                | Proteobacteria | deltaproteobacteria | Syntrophobacterales | Syntrophaceae    |
| <i>Syntrophus sp. RIFOXYC2_FULLL_54-9</i> | 143 | 16 | 11.19 | 26 | Ga0156700_12733                | Proteobacteria | deltaproteobacteria | Syntrophobacterales | Syntrophaceae    |



|                                                                                          |     |    |       |    |                  |                |                     |                                     |                       |
|------------------------------------------------------------------------------------------|-----|----|-------|----|------------------|----------------|---------------------|-------------------------------------|-----------------------|
| <i>Syntrophus sp.</i><br><i>RIFOXYC2_FULL_54_9</i>                                       | 152 | 15 | 9.87  | 40 | Ga0156700_12734  | Proteobacteria | deltaproteobacteria | Syntrophobacterales                 | Syntrophaceae         |
| <i>Desulfoglaeba</i><br><i>alkanexedens</i>                                              | 142 | 19 | 13.38 | 28 | Ga0097685_112250 | Proteobacteria | deltaproteobacteria | Syntrophobacterales                 | Syntrophobacteraceae  |
| <i>Desulfoglaeba</i><br><i>alkanexedens</i>                                              | 148 | 14 | 9.46  | 29 | Ga0097685_112248 | Proteobacteria | deltaproteobacteria | Syntrophobacterales                 | Syntrophobacteraceae  |
| <i>Syntrophobacter sp</i><br><i>DG_60</i>                                                | 159 | 17 | 10.69 | 40 | Ga0111222_10275  | Proteobacteria | deltaproteobacteria | Syntrophobacterales                 | Syntrophobacteraceae  |
| <i>Syntrophobacter_fumar</i><br><i>oxidans</i>                                           | 138 | 17 | 12.32 | 33 | Sfum_2558        | Proteobacteria | deltaproteobacteria | Syntrophobacterales                 | Syntrophobacteraceae  |
| <i>Syntrophobacter_fumar</i><br><i>oxidans</i>                                           | 141 | 15 | 10.64 | 37 | Sfum_0126        | Proteobacteria | deltaproteobacteria | Syntrophobacterales                 | Syntrophobacteraceae  |
| <i>Syntrophobacterales</i><br><i>bacterium Delta_03</i>                                  | 110 | 10 | 9.09  | 23 | Ga0154228_11166  | Proteobacteria | deltaproteobacteria | Syntrophobacterales                 | Syntrophobacteraceae  |
| <i>Syntrophobacterales</i><br><i>bacterium Delta_03</i>                                  | 110 | 10 | 9.09  | 23 | Ga0154228_14366  | Proteobacteria | deltaproteobacteria | Syntrophobacterales                 | Syntrophobacteraceae  |
| <i>Syntrophobacterales</i><br><i>bacterium</i><br><i>GWC2_56_13</i>                      | 112 | 11 | 9.82  | 23 | Ga0154454_106515 | Proteobacteria | deltaproteobacteria | Syntrophobacterales                 | Syntrophobacteraceae  |
| <i>Syntrophobacterales</i><br><i>bacterium</i><br><i>RBG_19FT_COMBO_5</i><br><i>9_10</i> | 143 | 17 | 11.89 | 23 | Ga0154884_10387  | Proteobacteria | deltaproteobacteria | Syntrophobacterales                 | Syntrophobacteraceae  |
| <i>Syntrophorhabdus</i><br><i>aromaticivorans</i>                                        | 128 | 13 | 10.16 | 27 | SynarDRAFT_0290  | Proteobacteria | deltaproteobacteria | Syntrophobacterales                 | Syntrophorhabdaceae   |
| <i>Deferrisoma</i><br><i>camini</i>                                                      | 126 | 14 | 11.11 | 22 | DefcaDRAFT_3087  | Proteobacteria | deltaproteobacteria | unclassified<br>deltaproteobacteria |                       |
| <i>Dissulfuribacter</i><br><i>thermophilus</i>                                           | 130 | 15 | 11.54 | 25 | WP_067615408     | Proteobacteria | deltaproteobacteria | unclassified<br>deltaproteobacteria |                       |
| <i>Dissulfuribacter</i><br><i>thermophilus</i>                                           | 141 | 16 | 11.35 | 23 | DBT_0123         | Proteobacteria | deltaproteobacteria | unclassified<br>deltaproteobacteria |                       |
| <i>Dissulfuribacter</i><br><i>thermophilus</i>                                           | 130 | 15 | 11.54 | 24 | DBT_0128         | Proteobacteria | deltaproteobacteria | unclassified<br>deltaproteobacteria |                       |
| <i>Dissulfurirhabdus</i><br><i>thermomarina</i>                                          | 60  | 7  | 11.67 | 22 | WP_163298855     | Proteobacteria | deltaproteobacteria | unclassified<br>deltaproteobacteria |                       |
| <i>Sulfuricaulis</i><br><i>limicola</i>                                                  | 174 | 18 | 10.34 | 22 | Ga0258544_11912  | Proteobacteria | gammaproteobacteria | Acidiferrobacterales                | Acidiferrobacteraceae |
| <i>Ferrimonas</i><br><i>balearica</i>                                                    | 165 | 17 | 10.30 | 22 | Fbal_0401        | Proteobacteria | gammaproteobacteria | Alteromonadales                     | Ferrimonadaceae       |
| <i>Ferrimonas</i><br><i>futtsuensis</i>                                                  | 174 | 22 | 12.64 | 22 | G505DRAFT_01246  | Proteobacteria | gammaproteobacteria | Alteromonadales                     | Ferrimonadaceae       |
| <i>Ferrimonas</i><br><i>kyonanensis</i>                                                  | 164 | 19 | 11.59 | 22 | H598DRAFT_00119  | Proteobacteria | gammaproteobacteria | Alteromonadales                     | Ferrimonadaceae       |
| <i>Ferrimonas</i><br><i>kyonanensis</i>                                                  | 169 | 18 | 10.65 | 22 | H598DRAFT_02276  | Proteobacteria | gammaproteobacteria | Alteromonadales                     | Ferrimonadaceae       |
| <i>Ferrimonas</i><br><i>sediminum</i>                                                    | 169 | 20 | 11.83 | 22 | WP_090362508     | Proteobacteria | gammaproteobacteria | Alteromonadales                     | Ferrimonadaceae       |
| <i>Ferrimonas</i><br><i>sediminum</i>                                                    | 175 | 22 | 12.57 | 22 | WP_090365039     | Proteobacteria | gammaproteobacteria | Alteromonadales                     | Ferrimonadaceae       |
| <i>Shewanella</i><br><i>baltica</i>                                                      | 171 | 19 | 11.11 | 22 | Sbal175DRAFT_207 | Proteobacteria | gammaproteobacteria | Alteromonadales                     | Shewanellaceae        |

|                                             |     |    |       |    |                  |                       |                       |                          |                           |
|---------------------------------------------|-----|----|-------|----|------------------|-----------------------|-----------------------|--------------------------|---------------------------|
| <i>Shewanella japonica</i>                  | 126 | 13 | 10.32 | 33 | Ga0198655_111312 | Proteobacteria        | gammaproteobacteria   | Alteromonadales          | Shewanellaceae            |
| <i>Shewanella livingstonensis</i>           | 124 | 12 | 9.68  | 34 | Ga0397901_3456   | Proteobacteria        | gammaproteobacteria   | Alteromonadales          | Shewanellaceae            |
| <i>Shewanella pealeana</i>                  | 172 | 19 | 11.05 | 22 | Spea_3315        | Proteobacteria        | gammaproteobacteria   | Alteromonadales          | Shewanellaceae            |
| <i>Serratia liquefaciens</i>                | 154 | 17 | 11.04 | 37 | M495_19940       | Proteobacteria        | gammaproteobacteria   | Enterobacterales         | Yersiniaceae              |
| <i>Serratia marcescens</i>                  | 131 | 12 | 9.16  | 30 | Ser94DRAFT_3844  | Proteobacteria        | gammaproteobacteria   | Enterobacterales         | Yersiniaceae              |
| <i>Pseudomonas stutzeri</i>                 | 122 | 13 | 10.66 | 25 | Psest_0808       | Proteobacteria        | gammaproteobacteria   | Pseudomonadales          | Pseudomonadaceae          |
| <i>Metallibacterium scheffleri</i>          | 127 | 13 | 10.24 | 36 | WP_081127719     | Proteobacteria        | gammaproteobacteria   | Xanthomonadales          | Rhodanobacteraceae        |
| <i>Metallibacterium scheffleri</i>          | 155 | 15 | 9.68  | 30 | WP_081127244     | Proteobacteria        | gammaproteobacteria   | Xanthomonadales          | Rhodanobacteraceae        |
| <i>Metallibacterium scheffleri</i>          | 126 | 13 | 10.32 | 27 | WP_168708890     | Proteobacteria        | gammaproteobacteria   | Xanthomonadales          | Rhodanobacteraceae        |
| <i>Metallibacterium scheffleri</i>          | 126 | 13 | 10.32 | 27 | WP_081129858     | Proteobacteria        | gammaproteobacteria   | Xanthomonadales          | Rhodanobacteraceae        |
| <i>Mariprofundus aestuarium</i>             | 153 | 15 | 9.80  | 22 | Ga0263988_11521  | Proteobacteria        | zetaproteobacteria    | Mariprofundales          | Mariprofundaceae          |
| <i>Mariprofundus aestuarium</i>             | 141 | 13 | 9.22  | 30 | Ga0263988_111426 | Proteobacteria        | zetaproteobacteria    | Mariprofundales          | Mariprofundaceae          |
| <i>Mariprofundus aestuarium</i>             | 160 | 15 | 9.38  | 27 | Ga0263988_111430 | Proteobacteria        | zetaproteobacteria    | Mariprofundales          | Mariprofundaceae          |
| <i>Mariprofundus ferrinatatus</i>           | 159 | 16 | 10.06 | 27 | Ga0263277_11984  | Proteobacteria        | zetaproteobacteria    | Mariprofundales          | Mariprofundaceae          |
| <i>Mariprofundus ferrinatatus</i>           | 141 | 13 | 9.22  | 30 | Ga0263277_11988  | Proteobacteria        | zetaproteobacteria    | Mariprofundales          | Mariprofundaceae          |
| <i>Mariprofundus ferrinatatus</i>           | 187 | 19 | 10.16 | 33 | Ga0263277_111747 | Proteobacteria        | zetaproteobacteria    | Mariprofundales          | Mariprofundaceae          |
| <i>Mariprofundus ferrooxydans</i>           | 160 | 18 | 11.25 | 27 | A37KDRAFT_01712  | Proteobacteria        | zetaproteobacteria    | Mariprofundales          | Mariprofundaceae          |
| <i>Mariprofundus ferrooxydans</i>           | 153 | 15 | 9.80  | 22 | A37KDRAFT_02006  | Proteobacteria        | zetaproteobacteria    | Mariprofundales          | Mariprofundaceae          |
| <i>Mariprofundus micogutta</i>              | 142 | 15 | 10.56 | 29 | Ga0166461_12227  | Proteobacteria        | zetaproteobacteria    | Mariprofundales          | Mariprofundaceae          |
| <i>Mariprofundus micogutta</i>              | 158 | 18 | 11.39 | 27 | Ga0166461_12231  | Proteobacteria        | zetaproteobacteria    | Mariprofundales          | Mariprofundaceae          |
| <i>Thermovirga lienii</i>                   | 153 | 15 | 9.80  | 39 | Tlie_0062        | Synergistetes         | Synergistia           | Synergistales            | Synergistaceae            |
| <i>Thermosulfurimonas dismutans</i>         | 150 | 22 | 14.67 | 23 | TDIS_1362        | Thermodesulfobacteria | Thermodesulfobacteria | Thermodesulfobacteriales | Thermodesulfobacteriaceae |
| <i>Thermosulfurimonas dismutans</i>         | 171 | 25 | 14.62 | 17 | TDIS_2013        | Thermodesulfobacteria | Thermodesulfobacteria | Thermodesulfobacteriales | Thermodesulfobacteriaceae |
| <i>Thermotoga maritima</i>                  | 160 | 18 | 11.25 | 30 | Thema_1715       | Thermotogae           | Thermotogae           | Thermotogales            | Thermotogaceae            |
| <i>Candidatus Electronema sp. GS</i>        | 166 | 22 | 13.25 | 20 | TAA75411         | Proteobacteria        | deltaproteobacteria   | Desulfobacteriales       | Desulfobulbaceae          |
| <i>Candidatus Electrothrix aarhusiensis</i> | 174 | 19 | 10.92 | 28 | RWX44375         | Proteobacteria        | deltaproteobacteria   | Desulfobacteriales       | Desulfobulbaceae          |
| <i>Candidatus Electrothrix</i>              | 170 | 20 | 11.76 | 22 | RWX49752         | Proteobacteria        | deltaproteobacteria   | Desulfobacteriales       | Desulfobulbaceae          |

|                                                                                                                 |     |    |       |    |                          |                          |                                  |                    |                                   |
|-----------------------------------------------------------------------------------------------------------------|-----|----|-------|----|--------------------------|--------------------------|----------------------------------|--------------------|-----------------------------------|
| <i>communis</i>                                                                                                 |     |    |       |    |                          |                          |                                  |                    |                                   |
| <i>Enriched cells of cold seep sediment from Jaco Scar, coast of Costa Rica, Pacific Ocean - ANME aggregate</i> | 138 | 18 | 13.04 | 22 | Ga0402027_211_700_2_7454 | Proteobacteria           | deltaproteobacteria              | Desulfobacterales  | unclassified<br>Desulfobacterales |
| <i>Sediment cell enrichment communities from methane seep in Santa Monica Basin, California</i>                 | 160 | 15 | 9.38  | 18 | Ga0255429_109616         | Proteobacteria           | deltaproteobacteria              | Desulfobacterales  | unclassified<br>Desulfobacterales |
| <i>Enriched cells of cold seep sediment from Jaco Scar, coast of Costa Rica, Pacific Ocean - ANME aggregate</i> | 99  | 11 | 11.11 | 22 | Ga0402001_443_209_7_2438 | Proteobacteria           | deltaproteobacteria              | Desulfobacterales  | unclassified<br>Desulfobacterales |
| <i>Candidatus Marsarchaeota G2 archaeon BE_D</i>                                                                | 266 | 35 | 13.16 | 27 | PSO06057                 | Candidatus Marsarchaeota | Candidatus Marsarchaeota group 2 |                    |                                   |
| <i>Metallosphaera prunae</i>                                                                                    | 283 | 39 | 13.78 | 43 | QCO31065                 | Crenarchaeota            | Thermoprotei                     | Sulfolobales       | Sulfolobaceae                     |
| <i>Metallosphaera sedula</i>                                                                                    | 283 | 39 | 13.78 | 27 | Msed_1330                | Crenarchaeota            | Thermoprotei                     | Sulfolobales       | Sulfolobaceae                     |
| <i>Metallosphaera yellowstonensis</i>                                                                           | 285 | 39 | 13.68 | 27 | MetMK1DRAFT_0014300      | Crenarchaeota            | Thermoprotei                     | Sulfolobales       | Sulfolobaceae                     |
| <i>Saccharolobus solfataricus</i>                                                                               | 289 | 40 | 13.84 | 27 | WP_010923832             | Crenarchaeota            | Thermoprotei                     | Sulfolobales       | Sulfolobaceae                     |
| <i>Sulfodiicoccus acidiphilus</i>                                                                               | 268 | 36 | 13.43 | 36 | BBD73228                 | Crenarchaeota            | Thermoprotei                     | Sulfolobales       | Sulfolobaceae                     |
| <i>Sulfolobus acidocaldarius</i>                                                                                | 293 | 34 | 11.60 | 27 | Saci_1178                | Crenarchaeota            | Thermoprotei                     | Sulfolobales       | Sulfolobaceae                     |
| <i>Sulfolobus islandicus</i>                                                                                    | 287 | 39 | 13.59 | 27 | WP_029163833             | Crenarchaeota            | Thermoprotei                     | Sulfolobales       | Sulfolobaceae                     |
| <i>Sulfurisphaera tokodaii</i>                                                                                  | 288 | 38 | 13.19 | 27 | WP_010980606             | Crenarchaeota            | Thermoprotei                     | Sulfolobales       | Sulfolobaceae                     |
| <i>Pyrococcus yanosii</i>                                                                                       | 255 | 30 | 11.76 | 25 | PYCH_12410               | Crenarchaeota            | Thermococci                      | Thermococcales     | Thermococcaceae                   |
| <i>Archaeoglobus fulgidus</i>                                                                                   | 193 | 21 | 10.88 | 33 | AF1055                   | Euryarchaeota            | Archaeoglobi                     | Archaeoglobales    | Archaeoglobaceae                  |
| <i>Archaeoglobus profundus</i>                                                                                  | 208 | 24 | 11.54 | 30 | ADB58439                 | Euryarchaeota            | Archaeoglobi                     | Archaeoglobales    | Archaeoglobaceae                  |
| <i>Geoglobus acetivorans</i>                                                                                    | 193 | 19 | 9.84  | 32 | Ga0069441_11963          | Euryarchaeota            | Archaeoglobi                     | Archaeoglobales    | Archaeoglobaceae                  |
| <i>Geoglobus acetivorans</i>                                                                                    | 189 | 21 | 11.11 | 25 | Ga0069441_11964          | Euryarchaeota            | Archaeoglobi                     | Archaeoglobales    | Archaeoglobaceae                  |
| <i>Methanoculleus chikugoensis</i>                                                                              | 190 | 21 | 11.05 | 26 | WP_074369502             | Euryarchaeota            | Methanomicrobia                  | Methanomicrobiales | Methanomicrobiaceae               |
| <i>Methanoculleus sediminis</i>                                                                                 | 187 | 19 | 10.16 | 30 | WP_048185443             | Euryarchaeota            | Methanomicrobia                  | Methanomicrobiales | Methanomicrobiaceae               |
| <i>Methanoculleus sp. MH98A</i>                                                                                 | 176 | 20 | 11.36 | 29 | WP_048114339             | Euryarchaeota            | Methanomicrobia                  | Methanomicrobiales | Methanomicrobiaceae               |

|                                                                                                                            |     |    |       |    |                  |               |                 |                    |                     |
|----------------------------------------------------------------------------------------------------------------------------|-----|----|-------|----|------------------|---------------|-----------------|--------------------|---------------------|
| <i>Methanospirillum hungatei</i>                                                                                           | 164 | 18 | 10.98 | 35 | Mhun_3140        | Euryarchaeota | Methanomicrobia | Methanomicrobiales | Methanospirillaceae |
| "Sediment cell enrichment communities from methane seep in Santa Monica Basin, California, United States - ANME aggregate" | 168 | 18 | 10.71 | 27 | Ga0255419_101503 | Euryarchaeota | Methanomicrobia | Methanosarcinales  | ANME-2 cluster      |
| <i>Methanococoides sp. AM1</i>                                                                                             | 175 | 18 | 10.29 | 24 | WP_135612969     | Euryarchaeota | Methanomicrobia | Methanosarcinales  | Methanosarcinaceae  |
| <i>Methanohalophilus euhalobius</i>                                                                                        | 188 | 22 | 11.70 | 35 | WP_105460445     | Euryarchaeota | Methanomicrobia | Methanosarcinales  | Methanosarcinaceae  |
| <i>Methanosarcina acetivorans</i>                                                                                          | 179 | 17 | 9.50  | 29 | MA3061           | Euryarchaeota | Methanomicrobia | Methanosarcinales  | Methanosarcinaceae  |
| <i>Methanosarcina acetivorans</i>                                                                                          | 204 | 23 | 11.27 | 26 | MA3062           | Euryarchaeota | Methanomicrobia | Methanosarcinales  | Methanosarcinaceae  |
| <i>Methanosarcina horonobensis</i>                                                                                         | 185 | 18 | 9.73  | 31 | Ga0072443_111234 | Euryarchaeota | Methanomicrobia | Methanosarcinales  | Methanosarcinaceae  |
| <i>Methanosarcina sp. DH1</i>                                                                                              | 208 | 20 | 9.62  | 30 | Ga0399897_3553   | Euryarchaeota | Methanomicrobia | Methanosarcinales  | Methanosarcinaceae  |
| <i>Pyrococcus furiosus</i>                                                                                                 | 260 | 31 | 11.92 | 25 | PF0337           | Euryarchaeota | Thermococci     | Thermococcales     | Thermococcaceae     |
| <i>Thermococcus celer</i>                                                                                                  | 258 | 27 | 10.47 | 28 | Ga0225983_11306  | Euryarchaeota | Thermococci     | Thermococcales     | Thermococcaceae     |
| <i>Thermococcus chitonophagus</i>                                                                                          | 257 | 27 | 10.51 | 27 | Ga0225912_111910 | Euryarchaeota | Thermococci     | Thermococcales     | Thermococcaceae     |
| <i>Thermococcus eurythermalis</i>                                                                                          | 258 | 26 | 10.08 | 25 | Ga0069357_12493  | Euryarchaeota | Thermococci     | Thermococcales     | Thermococcaceae     |
| <i>Thermococcus guaymasensis</i>                                                                                           | 254 | 25 | 9.84  | 25 | Ga0129129_11828  | Euryarchaeota | Thermococci     | Thermococcales     | Thermococcaceae     |
| <i>Thermococcus indicus</i>                                                                                                | 260 | 26 | 10.00 | 25 | WP_139681201     | Euryarchaeota | Thermococci     | Thermococcales     | Thermococcaceae     |
| <i>Thermococcus kodakaraensis</i>                                                                                          | 286 | 28 | 9.79  | 32 | Q9V2X1           | Euryarchaeota | Thermococci     | Thermococcales     | Thermococcaceae     |
| <i>Thermococcus kodakaraensis</i>                                                                                          | 271 | 36 | 13.28 | 25 | Q9V2W7           | Euryarchaeota | Thermococci     | Thermococcales     | Thermococcaceae     |
| <i>Thermococcus kodakaraensis</i>                                                                                          | 214 | 20 | 9.35  | 27 | Q9V2W8           | Euryarchaeota | Thermococci     | Thermococcales     | Thermococcaceae     |
| <i>Thermococcus litoralis</i>                                                                                              | 247 | 23 | 9.31  | 27 | OCC_10374        | Euryarchaeota | Thermococci     | Thermococcales     | Thermococcaceae     |
| <i>Thermococcus litoralis</i>                                                                                              | 307 | 28 | 9.12  | 29 | OCC_10379        | Euryarchaeota | Thermococci     | Thermococcales     | Thermococcaceae     |
| <i>Thermococcus nautili</i>                                                                                                | 259 | 26 | 10.04 | 25 | BD01_1148        | Euryarchaeota | Thermococci     | Thermococcales     | Thermococcaceae     |
| <i>Thermococcus onnurineus</i>                                                                                             | 261 | 27 | 10.34 | 28 | TON_1185         | Euryarchaeota | Thermococci     | Thermococcales     | Thermococcaceae     |
| <i>Thermococcus peptonophilus</i>                                                                                          | 256 | 25 | 9.77  | 27 | Ga0133415_11413  | Euryarchaeota | Thermococci     | Thermococcales     | Thermococcaceae     |
| <i>Thermococcus profundus</i>                                                                                              | 212 | 21 | 9.91  | 27 | WP_088857827     | Euryarchaeota | Thermococci     | Thermococcales     | Thermococcaceae     |

|                                 |     |    |      |    |        |               |                |                   |                    |
|---------------------------------|-----|----|------|----|--------|---------------|----------------|-------------------|--------------------|
| <i>Thermoplasma acidophilum</i> | 227 | 21 | 9.25 | 29 | Ta0553 | Euryarchaeota | Thermoplasmata | Thermoplasmatales | Thermoplasmataceae |
|---------------------------------|-----|----|------|----|--------|---------------|----------------|-------------------|--------------------|

<sup>1</sup> The amino acid length is given for mature pili after signal peptide sequence removal at the prepilin cleavage site.

<sup>2</sup> Largest number of consecutive amino acids without an aromatic amino acid in the pilin sequence.

## Reference

1. Walker DJF, Nevin KP, Nonnenmann SS, Holmes DE, Woodard TL, Ward JE, Rotaru A-E, Mcinerney MJ, Lovley DR. 2020. Syntrophus conductive pili demonstrate that common hydrogen-donating syntrophs can have a direct electron transfer option. ISME J 14:837-846.
